# Supplementary material for: New nucleoside based solid supports. Synthesis of 5′,3′-derivatized thymidine analoguesElectronic supplementary information (ESI) available: experimental details. See http://www.rsc.org/suppdata/cc/b1/b107200p/
Source: Royal Society of Chemistry journal article supplement (doi:10.1039/b107200p), 2001-11-26
Supplement: b107200p.doc [file b107200p.doc]

New nucleoside based solid supports. Synthesis of 5’, 3’-derivatized thymidine analogues

**M. de Champdoré*a*, L. De Napoli*a*, G. Di Fabio*a*, A. Messere*b*, D. Montesarchio*a***

**and G. Piccialli*c***

*a Dipartimento di Chimica Organica e Biochimica, Università degli Studi di Napoli “Federico II”, via Cynthia 4, 80126 Napoli – Italy;*

*b.Dipartimento di Scienze Ambientali, Seconda Università di Napoli, via Vivaldi 43, 81100 Caserta – Italy;*

*c.Facoltà di Scienze, Università del Molise, via Mazzini 8, 86170 Isernia – Italy.*

# ELECTRONIC SUPPLEMENTARY INFORMATION:

# Experimental details

**EXPERIMENTAL**

*General Method.* NMR spectra were recorded in CDCl3 or CD3OD with a "Gemini XL 200" and "Bruker WM 400" spectrometer. The chemical shifts () are given in ppm with respect to the residual signal solvent and coupling constants (J) in Hz. Tentagel-NH2 resin was purchased from Rapp Polymere, Tubingen, Germany. The solid support functionalizations with derivative **17** were carried out in a short glass column (5 cm length, 1 cm i.d.) equipped with a sintered glass filter, a stopcock and a cap. Dinucleotides **8**, **12** and **13** were assembled on a Millipore Cyclone Plus DNA synthesizer, using commercially available 3’-O-(2-cyanoethyl)-N,N-diisopropylphosphoramidite 2’-deoxyribonucleosides as building blocks in a standard coupling procedure.[[1]](#endnote-2) HPLC analyses and purifications were performed on a Beckman System Gold instrument equipped with a UV detector module 166 and a Shimadzu Chromatopac C-R6A integrator. Conventional abbreviations are used.

*Synthesis of -hydroxyethylthioether resin* ***2*** 0.86 g (11 mmol) of mercaptoethanol (**15**, Scheme) dissolved in 5 mL of anhydrous DMF with 2.29 g (16.5 mmol) of K2CO3 were reacted with 1.0 g (5.5 mmol) of ethyl-3-bromopropionate (**14**) at 60 °C for 3 h. The reaction was quenched by addition of water and the resulting mixture, concentrated under reduced pressure and taken up in 100 mL of CHCl3, was washed with water, dried over MgSO4, filtered and concentrated. The residue, purified by silica gel chromatography (isocratic gradient, 20 % ethyl acetate in benzene), afforded 0.93 g of compound **16** (5.2 mmol, 95 %).

0.5 g (2.8 mmol) of **16** were then treated with 0.95 g (2.8 mmol) of 4,4’-dimethoxytriphenylmethyl chloride (DMTCl) and 0.017 g (0.14 mmol) of 4-dimethylaminopyridine (DMAP) in 4 mL of anhydrous pyridine at r.t. for 3 h. The reaction was quenched by addition of water and the resulting mixture, concentrated under reduced pressure and purified by silica gel chromatography (isocratic gradient, 5 % ethyl acetate in benzene), afforded 1.2 g of the desired dimethoxytritylated compound (2.6 mmol, 93 %). 0.5 g (1.0 mmol) of this compound were then treated with 0.5 M NaOH in CH3OH/ H2O (1:1, v/v) at r. t. for 2 h. The mixture, neutralized with CH3COOH, then concentrated under reduced pressure, was diluted with CHCl3 and washed with water, dried over MgSO4, filtered and concentrated under reduced pressure and purified by silica gel chromatography (isocratic gradient, 2 % CH3OH in CHCl3 with 0.05 of pyridine), affording 0.43 g of compound **17** (0.96 mmol, 96 %).

**17 NMR 1H** (CD3OD, 200 MHz): 7.45-6.76 (complex signals, 13H, aromatic protons); 3.70 (s, 6H, 2 x OC**H**3); 3.22 (t, 2H, C**H**2ODMT); 2.58 (t, 2H, SC**H**2CH2ODMT); 2.42 (t, 2H, C**H**2SCH2CH2ODMT); 2.23 (t, 2H, HOOCC**H**2); 1.56 (m, 4H, CH2C**H**2C**H**2CH2).

**NMR 13C** (CD3OD, 50.0 MHz): 175.76 (HOO**C**CH2); 160.47, 147.05, 137.98, 131.68, 129.75, 129.21, 128.23, 114.54 (**C** sp2 carbons DMT); 88.01 (O**C**Ph3); 65.15 (**C**H2ODMT); 56.19 (O**C**H3), 34.94 (HOOC**C**H2); 33.41 and 33.10 (**C**H2S**C**H2CH2ODMT); 30.68 (HOOCCH2**C**H2); 25.62 (CH2**C**H2CH2S).

**FAB-MS** (positive ions) m/z: 481 (M+H)+; 303 (DMT)+.

200 mg of Tentagel®-NH2 (0.24 meq/g, 0.048 mmol) were reacted with a mixture of 255 mg (0.48 mmol) of **17** and 10 mg (0.48 mmol) of DCCI in 500 L of anhydrous CH2Cl2 (DCM) and 151 mg (0.40 mmol) of N-hydroxybenzotriazole (HOBt) in 300 L of anhydrous DMF at r.t. for 12 h. After exhaustive washings with DCM, CH3OH and Et2O, the support was dried under reduced pressure. DMT test performed on dried and weighed samples of resulting support **2** allowed the determination of the incorporation yield of derivative **17** onto the Tentagel® resin, which resulted to be 80 % (0.19 meq/g). After a classical capping reaction with acetic anhydride in pyridine (1:1, v/v) to block the unreacted amino groups, DMT protecting group was removed by standard 1 % DCA in DCM treatment, thus obtaining support **2**.

*A general procedure for the preparation of supports* ***5*** *and* ***6*** (**Mitsunobu approach**) 223 L (1.4 mmol) of diethylazadicarboxylate (DEAD) were added to 367 mg (1.4 mmol) of triphenylphosphine (TPP) dissolved in 800 L of THF at 0 °C. After 10 min the mixture was added to 200 mg (0.2 meq/g, 0.04 mmol) of support **2** suspended with a mixture of 0.24 mmol of **3**[[2]](#endnote-3) (or **4**[[3]](#endnote-4)**)** in 700 L of anhydrous DCM. After exhaustive washings with DCM, CH3OH and Et2O, resulting supports **5** and **6** were dried under reduced pressure.

Incorporation yields of derivative **3** (or **4**) onto **2** were 90 % (0.17 meq/g), as determined by DMT test performed on dried and weighed samples of supports **5** and **6**.

*Synthesis of* ***8*** The removal of TBDMS protecting group was achieved by treatment of 50 mg (0.17 meq/g, 0.009 mmol) of support **5** with 14 L (0.09 mmol) of Et3N·3HF in 500 L of anhydrous THF at r.t. overnight. The resulting support was successively coupled with the required 2’-deoxycytidine-3’-phosphoramidite derivative following standard automated procedures. Deprotection and detachment of the dinucleotide 5’T-p-C5’ were achieved by first oxidizing the thioether function to solfone by treatment with 3 mL of 0.5 M mClPBA in DCM for 1 h at r. t., followed by DMT removal by DCA addition and treatment with a conc. aq. ammonia treatment at 60 °C for 18 h. The structure of isolated compound **8** was further confirmed by comparison with an authentic sample, synthesized following a classical solution phosphotriester protocol.[[4]](#endnote-5)

|  | **Purified** by HPLC on a Vertex Lichrosorb RP18 analytical column (250 x 4.0 mm, 5 m), using a linear gradient (from 0 to 30 % in 30 min) of CH3CN in 0.1 M triethylammonium bicarbonate buffer, pH=7 (flow 0.8 mL/min, detection at =260 nm), it showed the following retention time: 19.5 min. |
| --- | --- |

**NMR 1H** (D2O, 200 MHz): 7.97 (d, 1H, **H**-6 2’-deoxycytidine residue); 7.73 (s, 1H, **H**-6 T residue); 6.42-6.35 (m, 2H, **H**-5 2’-deoxycytidine residue and **H**-1’ T residue); 6.20 (dd, 1H, **H**-1’ 2’-deoxycytidine residue); 4.31 (m, 2H, **H**-4’); 3.92 (m, 4H, **H**-5’); 2.73-2.42 (m, 4H, **H**-2’); 1.98 (s, 3H, C**H**3 T residue). The **H**-3’ signals were submerged by the residual solvent peak.

**FAB-MS** (negative ions): 530 (M-H)-.

*Synthesis of* ***10a*** 150 mg (0.17 meq/g, 0.026 mmol) of dried support **6** were washed and swelled in anhydrous DMF under N2 for 30 min. To a solution of 136 mg (0.38 mmol) of Fmoc-Leu-OH and 52 mg (0.38 mmol) of HOBt in anhydrous DMF, 60 L (0.38 mmol) of N,N-diisopropylcarbodiimide (DIC) were added and the solution stirred for 10 min. The solution was then applied to support **6** and successively 70 L (0.28 mmol) of tri-*n*-butylphosphine (TBP) were added to the suspension, which was shaken for 18 h at r.t. After washings with DCM, CH3OH and Et2O, a standard capping procedure was carried out by treatment with Ac2O/Py (1:1, v/v), then the support was treated with 3 mL of 0.5 M mClPBA in DCM solution for 1 h at r.t. giving support **9a**. DMT and Fmoc removal were achieved by treatment with 1 % DCA in DCM and 20 % piperidine in DMF solution, respectively. The Kaiser test performed on dried and weighed sample of the resulting support allowed the determination of coupling yields which were 83 %. After capping of the amino functions with Ac2O/Py (1:1, v/v) for 1 h at r.t., the detachment of the hybrid was achieved by conc. aq. ammonia treatment at 60 °C for 18 h.

|  | **Purified** by HPLC on a Partisphere Whatman RP18 analytical column (125 x 4.0 mm, 5 m), using a linear gradient (from 0 to 60 % in 20 min) of CH3CN in H2O (flow 0.8 mL/min, detection at =260 nm), it showed the following retention time: 17.4 min. |
| --- | --- |

**NMR 1H** (CD3OD, 400 MHz): 7.87 (s, 1H, **H**-6 T residue); 6.24 (s, 1H, J=6.3, **H**-1’ T residue); 4.50 (m, 1H, **H**-3’ T residue); 4.30 (m, 1H, **H**-1 Leu residue); 3.87-3.68 (m, 3H, **H**-4’ and **H**-5’); 2.33 (t, 2H, **H**-2’ T residue); 1.98 (s, 3H, C**H**3CO ); 1.89 (s, 3H, C**H**3 T residue); 1.68-1.54 (m, 3H, C**H** and C**H**2 side chain Leu residue); 0.97 and 0.92 (d’s, 6H, 2 x C**H**3 side chain Leu).

**ES-MS** (positive ions): 397 (M+H)+.

*Synthesis of* ***12*** *and* ***13*** 120 mg (0.17 meq/g, 0.021 mmol) of dried support **9a** were washed and swelled in anhydrous DMF under N2 for 30 min. This support was successively coupled with the required 2’-deoxyadenosine-3’-phosphoramidite derivative following standard automated procedures3. The coupling yields were 98 % as determined by DMT test performed on dried and weighed samples of the resulting support.

An aliquot of support **11** was then treated with 1 % DCA in DCM and 20 % piperidine in DMF solution, respectively, for DTM and Fmoc removal followed by capping of the amino function by reaction with Ac2O/Py (1:1, v/v) for 1 h at r.t. The detachment and deprotection of hybrid **12** were achieved by conc. aq. ammonia treatment at 60 °C for 18 h.

|  | **Purified** by HPLC on a Partisphere Whatman RP18 analytical column (125 x 4.0 mm, 5 mm), using a linear gradient (from 0 to 90 % in 30 min) of CH3CN in H2O (flow 0.8 mL/min, detection at =260 nm), it showed the following retention time: 8.3 min. |
| --- | --- |

**NMR 31P** (D2O, 161.98 MHz): 0.67.

**NMR 1H** (CD3OD, 400 MHz): 8.37 (s, 1H, **H**-2 2’dA residue); 8.23 (s, 1H, **H**-8 2’dA residue); 7.53 (s, 1H, **H**-6 T residue); 6.44 (t, 1H, **H**-1’, J=6.6, 2’dA residue); 6.20 (t, 1H, **H**-1’, J=6.0, T residue); 4.61 (m, 1H, **H**-3’ 2’dA residue); 4.37 (m, 1H, **H**-4’ T residue); 4.30 (m, 2H, **H**-5’ T residue); 4.14 (m, 1H, **H**-4’ 2’dA residue); 4.06-3.90 (m, 2H, **H**-3’ T residue and **H**- Leu residue); 3.87 (m, 2H, **H**-5’ T residue); 2.83 (m, 2H, **H**-2’ 2’dA residue); 2.40 (m, 2H, **H**-2’ T residue); 2.05 (s, 3H, C**H**3CO ); 1.95 (s, 3H, C**H**3 T residue); 1.67-1.54 (m, 3H, C**H** and C**H**2 side chain Leu residue); 0.95 and 0.90 (d’s, 6H, 2 x C**H**3 side chain Leu).

**ES-MS** (negative ions): 707 (M-H)-.

Another aliquot of support **11** (60 mg, 0.010 mmol) was treated with 20 % piperidine in DMF solution and reacted with a mixture of 40 mg (0.103 mmol) of Fmoc-Phe-OH and 21 mg (0.103 mmol) of DCCI in 700 L of anhydrous DCM and 13.8 mg (0.103 mmol) of N-hydroxybenzotriazole (HOBt) dissolved in 300 L of anhydrous DMF at r.t. for 6 h following standard Fmoc protocol[[5]](#endnote-6). After washings with DCM, CH3OH and Et2O, DMT and Fmoc removal were subsequently carried out by treatment first with 1 % DCA in DCM and then with 20 % piperidine in DMF solution. The Kaiser test performed on dried and weighed samples of the resulting support allowed the determination of the coupling yields which were 90 %. After capping of the amino functions by reaction with Ac2O/Py (1:1, v/v) for 1 h at r.t. the detachment and deprotection of hybrid **13** were achieved by conc. aq. ammonia treatment at 60 °C for 18 h.

|  | **Purified** by HPLC on a Partisphere Whatman RP18 analytical column (125 x 4.0 mm, 5 mm), using a linear gradient (from 0 to 90 % in 30 min) of CH3CN in H2O (flow 0.8 mL/min, detection at =260 nm), it showed the following retention time: 10.0 min. |
| --- | --- |

**NMR 31P** (D2O, 161.98 MHz): 0.71.

**NMR 1H** (D2O, 400 MHz): 8.32 (s, 1H, **H**-2, 2’dA residue); 8.21 (s, 1H, **H**-8, 2’dA residue); 7.60 (s, 1H, **H**-6, T residue); 7.32-7.21 (m, 5H, aromatic protons side chain Phe); 6.43 (t, 1H, **H**-1’, J=6.5, 2’dA residue); 6.20 (t, 1H, **H**-1’, J=6.0, T residue); 4.59-4.50 (m, 3H, **H**-1 Phe residue and **H**-3’ 2’dA residue); 4.37 (m, 1H, **H**-4’, T residue); 4.28 (m, 2H, **H**-5’, T residue); 4.15-4.00 (m, 2H, **H**-4’, 2’dA residue and **H**-3’ T residue); 3.89 (m, 2H, **H**-5’ 2’dA residue); 3.80 (m, 1H, **H**- Leu residue); 3.02 (m, 2H, C**H**2 side chain Phe); 2.90 (m, 2H, **H**-2’ 2’dA residue); 2.37 (dd, 2H, J=6.0 and J=13.2, **H**-2’ T residue) 1.99 (s, 3H, C**H**3CO ); 1.95 (s, 3H, C**H**3 T residue); 1.62-1.53 (m, 3H, C**H** and C**H**2 side chain Leu residue); 0.92 and 0.87 (d’s, 6H, 2 x C**H**3 side chain Leu).

**ES-MS** (negative ions): 855 (M-H)-.

*Synthesis of* ***10b*** 100 mg (0.17 meq/g, 0.017 mmol) of dried support **6** were washed and swelled in anhydrous DMF under N2 for 30 min. To a solution of 81 mg (0.26 mmol) of Fmoc-T(PNA)-OH and 34.6 mg (0.26 mmol) of HOBt in anhydrous DMF, 40 L (0.26 mmol) of N,N-diisopropylcarbodiimide (DIC) were added and the solution stirred for 10 min. The solution was then applied to support **6** followed by 47 L (0.19 mmol) of tri-*n*-butylphosphine (TBP), and the suspension mixed for 18 h at r.t. After washings with DCM, CH3OH and Et2O, a standard capping procedure was carried out by treatment with Ac2O/Py (1:1, v/v). Then the support was treated with 3 mL of 0.5 M mClPBA in DCM solution for 1 h at r. t. leading to **9b**. DMT and Fmoc removal were achieved by treatment with 1 % DCA in DCM and 20 % piperidine in DMF solutions respectively. The Kaiser test, performed on a dried and weighed sample of the resulting support, allowed the determination of the coupling yields which were 84 %. After capping of the amino functions by reaction with Ac2O/Py (1:1, v/v) for 1 h at r.t., the detachment of hybrid **10b** was achieved by conc. aq. ammonia treatment at 60 °C for 18 h.

|  | **Purified** by HPLC on a Partisphere Whatman RP18 analytical column (125 x 4.0 mm, 5 mm), using a linear gradient (from 0 to 90 % in 30 min) of CH3CN in H2O (flow 0.8 mL/min, detection at =260 nm), it showed the following retention time: 10.3 min. |
| --- | --- |

**NMR 1H** (D2O, 400 MHz): 7.69 (s, 1H, **H**-6, T nucleoside residue); 7.36 (s, 1H, **H**-6, T PNA residue); 6.31 (t, 1H, **H**-1’, J=5.7, T residue); 4.35 (m, 1H, **H**-3’ T residue); 4.14 (s, 2H, C**H**2 T PNA residue); 4.02 (m, 1H, **H**-4’ T residue); 3.88 (dd, 2H, **H**-5’, J=2.4, J=12.4, T residue); 3.75 (s, 2H, C**H**2, T PNA residue); 3.65 (t, 2H, J=6.0, C**H**2NHAc, T PNA residue); 3.52 (t, 2H, J=6.0, C**H**2CH2NHAc, T PNA residue); 2.47 (m, 2H, **H**-2’ T residue); 2.08 (s, 3H, C**H**3CO ); 1.99 (s, 3H, C**H**3 T residue).

**ES-MS** (positive ions): 550 (M+H)+.

1. Eckstein, F., Ed., *Oligonucleotides and Analogues: a Practical Approach*, IRL Press, Oxford, U. K., 1991. [↑](#endnote-ref-2)
2. K. M. Fries, C. Joswig, R. F. Borch, *J. Med. Chem.* 1995, **38**, 2672-2680; [↑](#endnote-ref-3)
3. R. P. Glinski, M. Sami Khan, R. L. Kalamas, *J. Org. Chem.* 1973, **38**, 4299-4305; [↑](#endnote-ref-4)
4. L. De Napoli, A. Messere, D. Montesarchio, A. Pepe, G. Piccialli, M. Varra, *J. Org. Chem.*, 1997, **62**, 9024. [↑](#endnote-ref-5)
5. E. Atherton, R. C. Sheppard, Ed., *Solid Phase Peptide Synthesis: A Practical Approach*, IRL Press, Oxford, U. K., 1991. [↑](#endnote-ref-6)
